# Supplementary material for: Formation of HNCO from carbon monoxide and atomic nitrogen in their fundamental states. Investigation of the reaction pathway in conditions relevant to the interstellar medium
Source: Royal Society of Chemistry journal article supplement (doi:10.1039/c4cp03876b), 2014-12-04
Supplement: c4cp03876b1.pdf [file c4cp03876b1.pdf]

### Supporting information

**Table S1:** Theoretical vibrational frequencies ( $\text{cm}^{-1}$ ) calculated at the PW91PW91/6-311++G\*\* level of theory from the most stable optimized structures for HNCO and its complexes with one or two molecules of water. The numbers in italics are the calculated relative intensities (in  $\text{km}\cdot\text{mol}^{-1}$ ). The most intense modes, as predicted by the theory, are underlined in yellow.

| HNCO                    |                 |                   | [HNCO][H <sub>2</sub> O] |                  |                              |        |
|-------------------------|-----------------|-------------------|--------------------------|------------------|------------------------------|--------|
| Theoretical frequencies | Attribution     | Observed at       | Theoretical frequencies  | Attribution      | Observed at                  |        |
| 557.4621                | 69.2855         | N-C-O bend        | 32.6310                  | <i>44.5060</i>   | H <sub>2</sub> O rocking     |        |
| 607.7260                | <i>0.6726</i>   | Torsion           | 72.5876                  | <i>5.8117</i>    |                              |        |
| 756.3479                | <i>191.2739</i> | H-N-C bend        | 183.8550                 | <i>14.1945</i>   |                              |        |
| 1297.0087               | <i>0.5311</i>   | N-C-O s. stretch  | 212.9379                 | <i>1.0266</i>    | H <sub>2</sub> O rocking     |        |
| <b>2296.9036</b>        | <b>648.3282</b> | N-C-O as. stretch | 244.1912                 | <i>231.8073</i>  | H <sub>2</sub> O wagging     |        |
| 3618.3971               | <i>143.7374</i> | N-H stretch       | 557.5174                 | <i>83.5091</i>   | N-C-O bend                   |        |
|                         |                 |                   | 584.6701                 | <i>57.2660</i>   | Torsion                      |        |
|                         |                 |                   | 617.2037                 | <i>4.0119</i>    | Torsion                      |        |
|                         |                 |                   | 721.4542                 | <i>15.2488</i>   | N-C-O bend                   |        |
|                         |                 |                   | 741.4083                 | <i>92.7038</i>   | Torsion                      |        |
|                         |                 |                   | 856.6151                 | <i>268.9464</i>  | H-N-C bend                   |        |
|                         |                 |                   | 1297.8463                | <i>14.6785</i>   | N-C-O s. stretch             |        |
|                         |                 |                   | 1584.670                 | <i>57.27</i>     | H <sub>2</sub> O scissoring  |        |
|                         |                 |                   | <b>2296.6287</b>         | <b>662.7453</b>  | N-C-O as. stretch            |        |
|                         |                 |                   | <b>3322.1058</b>         | <b>1154.6192</b> | N-H stretch                  | 3295.2 |
|                         |                 |                   | 3721.454                 | <i>15.25</i>     | H <sub>2</sub> O s. stretch  |        |
|                         |                 |                   | 3826.5784                | <i>82.8601</i>   | H <sub>2</sub> O as. stretch |        |

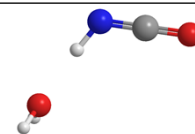

| $[\text{HNCO}][\text{H}_2\text{O}]_2$                                             |                 | $[\text{HNCO}][\text{H}_2\text{O}]_2$                                             |                  | Attribution                     |
|-----------------------------------------------------------------------------------|-----------------|-----------------------------------------------------------------------------------|------------------|---------------------------------|
| 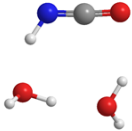 |                 |  |                  |                                 |
| 54.2287                                                                           | 1.8050          | 33.0475                                                                           | 0.4900           | General mode                    |
| 76.7321                                                                           | 4.5791          | 78.6143                                                                           | 7.3732           | General mode                    |
| 101.6025                                                                          | 1.7107          | 143.6310                                                                          | 3.6042           | General mode                    |
| 162.2371                                                                          | 58.0441         | 211.2534                                                                          | 34.5939          | General mode                    |
| 205.5332                                                                          | 11.9874         | 226.2066                                                                          | 30.6101          | (H <sub>2</sub> O) <sub>2</sub> |
| 220.3488                                                                          | 19.6322         | 238.5750                                                                          | 125.2304         | (H <sub>2</sub> O) <sub>2</sub> |
| 267.9919                                                                          | 144.2484        | 290.3879                                                                          | 111.2822         | (H <sub>2</sub> O) <sub>2</sub> |
| 290.9538                                                                          | 62.8704         | 320.2608                                                                          | 6.4550           | (H <sub>2</sub> O) <sub>2</sub> |
| 396.6723                                                                          | 97.4381         | 406.4250                                                                          | 84.0887          | (H <sub>2</sub> O) <sub>2</sub> |
| 427.7764                                                                          | 107.0181        | 537.6535                                                                          | 136.9088         | (H <sub>2</sub> O) <sub>2</sub> |
| 569.1027                                                                          | 80.2789         | 576.7485                                                                          | 102.8138         | General mode                    |
| 611.7326                                                                          | 19.0400         | 635.9199                                                                          | 55.4766          | Torsion                         |
| 710.4485                                                                          | 63.6318         | 744.9176                                                                          | 202.6887         | General mode                    |
| 777.2552                                                                          | 219.7629        | 791.5064                                                                          | 324.6472         | General mode                    |
| 988.9173                                                                          | 209.3427        | 1065.8670                                                                         | 235.5614         | H-N-C bend                      |
| 1289.1786                                                                         | 17.9448         | 1296.5465                                                                         | 13.6616          | N-C-O s. stretch                |
| 1590.3173                                                                         | 60.9822         | 1583.9931                                                                         | 78.7067          | H <sub>2</sub> O scissoring     |
| 1606.8535                                                                         | 39.7540         | 1598.3801                                                                         | 14.1374          | H <sub>2</sub> O scissoring     |
| <b>2280.9678</b>                                                                  | <b>621.9487</b> | <b>2293.7375</b>                                                                  | <b>716.8038</b>  | N-C-O as. stretch               |
| <b>3155.8763</b>                                                                  | <b>995.4931</b> | <b>3064.7568</b>                                                                  | <b>1361.9389</b> | N-H stretch                     |
| 3456.6896                                                                         | 509.9097        | 3416.2237                                                                         | 515.0792         | H <sub>2</sub> O stretch        |
| 3674.4532                                                                         | 73.3352         | 3567.5646                                                                         | 357.9374         | H <sub>2</sub> O stretch        |
| 3792.4649                                                                         | 72.5683         | 3790.6507                                                                         | 80.6790          | H <sub>2</sub> O stretch        |
| 3800.2339                                                                         | 112.8632        | 3793.1489                                                                         | 90.7218          | H <sub>2</sub> O stretch        |
